1

2

3

***In situ* observation and range extension of the first monoplacophoran  
*Neopilina galatheae***

4

5

6

Chong Chen<sup>1\*</sup>, John W. Jamieson<sup>2</sup>

7

8

<sup>1</sup> X-STAR, Japan Agency for Marine-Earth Science and Technology (JAMSTEC), 2–15

9

Natsushima-cho, Yokosuka, Kanagawa 237-0061, Japan

10

<sup>2</sup> Department of Earth Sciences, Memorial University of Newfoundland, St. John's, Newfoundland

11

A1B 3X5, Canada

12

\*Correspondence: [cchen@jamstec.go.jp](mailto:cchen@jamstec.go.jp)

13

ORCID: CC, 0000-0002-5035-4021; JWJ, 0000-0002-4783-8578

14

15

**Abstract**

16

17

18

19

20

21

22

23

24

25

26

27

28

29

30

Monoplacophoran molluscs have been dubbed ‘living fossils’ due to their absence in the fossil record for about 375 million years, until *Neopilina galatheae* Lemche, 1957 was trawled off Costa Rica in 1952. Since then, over 35 species of living monoplacophorans have been discovered. Nevertheless, *in situ* observations of these rare deep-sea animals remain scant. Here, we observed and collected an intact specimen of *N. galatheae* using a remotely operated vehicle from 2460 m deep on the Eastern Galápagos Spreading Center. The animal was found attached to the glassy surface of solidified basalt lava flow, and no feeding trails were found near the animal. Such hard substrate is in contrast with previous records that were trawled on sand and mud, suggesting *Neopilina* can be found on a wide range of substrates. This is the first time this species was collected since 1959, and represents a southeast range extension of about 1000 km for the species.

**Keywords:**

Deep sea, Galápagos, Living fossil, Mollusca, Monoplacophora

31

## Introduction

32

33 Monoplacophoran molluscs were thought to be extinct since the Devonian (~375  
34 million years ago) – until 1952 when suddenly 10 live individuals were brought up by  
35 the Danish *Galathea* expedition from 3570 m deep off Costa Rica in a single trawl on  
36 muddy clay (Lemche, 1957, Lemche & Wingstrand, 1959). Named *Neopilina galathea*  
37 Lemche, 1957, the discovery of this first living monoplacophoran mollusc is widely  
38 regarded as one of the most important zoological discoveries of the 20<sup>th</sup> Century  
39 (Lindberg, 2009, Ponder *et al.*, 2020). The *Galathea* trawl was a true “jackpot”, as  
40 follow-up cruises set to obtain further specimens near the type locality returned empty  
41 handed (Wolff, 1961) except the research vessel (R/V) *Vema*, which successfully  
42 collected a single specimen from 3718 m deep in 1958 (Menzies *et al.*, 1959). Then,  
43 three live specimens turned up off Baja California, Mexico in 1959 where they were  
44 trawled between 2781–2809 m deep, plus a fragment from a grab sampler at 1828 m  
45 (Parker, 1961, Wolff, 1961). These were taken from sandy sediment rich in organic  
46 matter, foraminifera tests, and quartz (Parker, 1961). And that was the last record of the  
47 mythical “living fossil” *N. galathea*, with no new specimen being collected for over six  
48 decades (Schwabe, 2008).

49

50 Since the discovery of *N. galathea*, over 35 living species of monoplacophorans have  
51 been described from around the globe (Ponder *et al.*, 2020). Most of these are small  
52 species below about 5 mm shell length, and at a maximum recorded length of 37 mm, *N.*  
53 *galathea* remains the largest species (Lemche & Wingstrand, 1959). Some small  
54 species have been found as shallow as 177 m (Wilson *et al.*, 2009), but large species in  
55 the genera *Neopilina*, *Vema*, and *Adenopilina* have only been found in waters over 1800  
56 m deep (Parker, 1961, Tebble, 1967). Although some small monoplacophorans have  
57 been recovered alive and observed in aquaria (Lowenstam, 1978) there is only one  
58 convincing seafloor observation of a living monoplacophoran in its natural habitat; that  
59 of a undescribed *Neopilina* species found off American Samoa (Sigwart *et al.*, 2019).  
60 These sightings were of animals living on basalt and associated with potential feeding  
61 trackways Some early seafloor images of the Atacama Trench from the *Vema* expedition  
62 contained straight trackways on mud that were claimed to be trails of the  
63 monoplacophoran *Vema ewingi* (Clarke & Menzies, 1959) (Menzies *et al.*, 1959).  
64 However, these trackways have been suggested to be more likely a misidentification of  
65 bivalve trails (Wolff, 1961) and their authenticity remain debated.

66

67 Here, we report a new record of *N. galathea* in the Galápagos Spreading Centre,  
68 representing a range extension to the south and also providing a first glimpse into the  
69 natural habitat of this ‘living fossil’.

70

71

72

73

## Materials and methods

74

75 Seafloor observation and sample collection were carried out using Schmidt Ocean  
76 Institute’s 4500 m rated remotely operated vehicle (ROV) *SuBastian* during cruise  
77 Fkt231024 on-board R/V *Falkor (too)*. Imagery was carried out using a 4K video  
78 camera (SULIS Subsea Z70; resolution 3840 x 2160 pixels) with 12X zoom capability.  
79 A CTD (conductivity, temperature, depth) sensor (Seabird FastCAT SBE49) and a  
80 dissolved oxygen Sensor (Aanderaa 3841 O2 Optode) on the ROV took real-time  
81 measurements at 1 second intervals. Sampling was done using a suction sampler  
82 mounted on ROV *SuBastian*.

83

84 Upon recovery of the ROV, the monoplacophoran specimen was retrieved from the  
85 suction chamber and gently cleaned using a brush. The cleaned specimen was observed  
86 with a Leica S APO stereomicroscope and photographed under chilled seawater using a  
87 EF 100 mm F2.8L MACRO IS USM macro lens and a Canon EOS 5Ds R digital  
88 single-lens reflex camera. Measurements were taken using a vernier calliper. Tissue  
89 snips were carefully taken from the posterior half of the foot using an iris scissor for  
90 future molecular work. After that, the entire monoplacophoran specimen was preserved  
91 in 80% ethanol. The specimen and all tissue snips are deposited in the Senckenberg  
92 Natural History Museum, Frankfurt under the catalogue number SMF 373198.

93

94

95

## Results

96

97 Dive #603 of ROV *SuBasitan* was conducted at the Rose Garden hydrothermal vent  
98 field on the Galápagos Rift where deep-sea hydrothermal vents were first discovered in  
99 1977 (Corliss *et al.*, 1979). An eruption event between 2005 and 2012 is known to have  
100 covered this area with a vitreous fresh lava flow, leading to the cessation of almost all  
101 venting activity (Shank *et al.*, 2012). During this dive ropey or lobate basaltic lava with  
102 glassy surface were seen across the area, often covered by a very thin layer of sediment

103 (Figure 1A). There was a complete lack of ongoing hydrothermal venting and only a  
104 patch of empty, dissolving serpulid tubes and empty shells of mussels and clams  
105 indicated the presence of diffuse flow not so long ago.

106

107 Near the top of a half-collapsed lava tower (Figure 1B; 0°48.2986'N, 86°13.1732'W,  
108 2461 m deep), we found a limpet-like animal (Figure 1C). Based on the very thin,  
109 translucent bilaterally symmetrical shell carrying a characteristic irregular or wavy  
110 growth lines, this was identified as a large-sized monoplacophoran (Lemche, 1957,  
111 Sigwart *et al.*, 2019). The monoplacophoran individual lived attached to the surface of a  
112 glassy basalt flow covered by a thin layer of sediment littered with numerous  
113 foraminiferal tests and hydroids. No feeding trails could be observed around the animal,  
114 and it did not move during the course of our observation which lasted approximately  
115 five minutes. To collect this extremely fragile specimen, the pilot first used the ROV's  
116 manipulator arm equipped with soft rubber on the tips to gently break the glassy lava  
117 around and below the monoplacophoran. After dislodging the specimen, it was then  
118 collected using suction sampler (see Supplementary Video for the collecting process).  
119 The monoplacophoran was collected at 00:46 UTC on October 28th, 2023 (water  
120 temperature 2.09°C, salinity 34.656, dissolved oxygen concentration 3.337 mg/L). The  
121 area had no hydrothermal influences.

122

123 The monoplacophoran individual (Figure 2) was retrieved fully intact, but it was no  
124 longer responsive when recovered on surface. The shell length was 26.8 mm and the  
125 shell width was 24.0 mm. This large size, and the presence of five pairs of gills in the  
126 pallial groove at this size, points to genus *Neopilina* – as *Vema*, the only other genus  
127 known to reach this size, has six pairs of gills as adults (Clarke & Menzies, 1959,  
128 Lemche, 1957, Warén & Gofas, 1996). The two large-sized *Neopilina* species inhabiting  
129 the eastern Pacific, *N. galathea* and *N. bruuni* Menzies, 1968, are readily distinguished  
130 by the postoral tentacles which are significantly reduced in *N. bruuni* compared to *N.*  
131 *galathea* (Menzies, 1968). The well-developed postoral tentacles in the newly  
132 collected specimen (Figure 2) and the matching gill structures as well as shell sculpture  
133 serve to identify this specimen as *N. galathea*. It is medium-sized for *N. galathea*  
134 (Lemche & Wingstrand, 1959), and as a result the apex position is not as anterior as the  
135 largest specimens; tracing growth lines in fig. 3 of Lemche & Wingstrand (1959)  
136 indicate that the holotype of *N. galathea* would have had a similar apex position at a  
137 size comparable to this specimen. The gills, velum, postoral tentacles, outer edge of the

138 foot, and pallial margin all carried bright orange pigmentation; while the lips around the  
139 mouth were reddish brown in colour.

140

141

142

## Discussion

143

144 The present record of the monoplacophoran *Neopilina galathea* is the southernmost  
145 credible record attributable to this rare species (Lemche & Wingstrand, 1959, Menzies,  
146 1968, Parker, 1961, Schwabe, 2008), extending its distribution approximately 1000 km  
147 south-eastwards from the type locality off Costa Rica. There are, however, several  
148 further monoplacophoran records attributed to *Neopilina* in the eastern Pacific south of  
149 the equator. The most notable is a record from the Atacama Trench off Chile (5°51.7'S,  
150 81°48.8'W; 5300–5320 m deep) attributed to “*Neopilina* aff. *galathea*” (Moskalev,  
151 1977). Unfortunately as this was only a passing mention in the footnote of a paper  
152 focusing on patellogastropod limpets with no information on size, morphology, or  
153 repository provided, this record cannot be verified. This record is geographically close  
154 to several other Atacama Trench records (5°51.7'-23°50'S, 71°06'-81°48.8'W;  
155 3909–6354 m deep) attributed to *Neopilina* sp. (Menzies, 1968, Moskalev *et al.*, 1983).  
156 Since Menzies (1968) who has previously collected *N. galathea* (Menzies *et al.*, 1959,  
157 Menzies & Layton, 1962) did not attribute these to *N. galathea*, it is reasonable to  
158 consider these to be another, possibly undescribed, species. The Moskalev (1977) record  
159 may be an additional record of this *Neopilina* sp.; though these records may also be a  
160 compilation of multiple species. To clarify the taxonomic affinity of these records,  
161 additional sampling at the Atacama Trench is warranted. Figure 3 presents a summary  
162 of these relevant *Neopilina* records from the eastern Pacific.

163

164 The new specimen of *N. galathea* was found alive on a solidified basaltic lava flow, in  
165 an area covered by a recent (2005-2012) eruption event (Shank *et al.*, 2012) and  
166 therefore devoid of thick sediment. This is in strong contrast to other known habitats for  
167 this species, including muddy clay surfaces (Lemche & Wingstrand, 1959), greenish  
168 ooze (Menzies *et al.*, 1959), and sandy mud rich in organic matter (Parker, 1961).  
169 Nevertheless, the only other *in situ* seafloor imagery of *Neopilina* was also taken on a  
170 basalt surface on a seamount (Sigwart *et al.*, 2019). Together with our observations,  
171 these observations suggest *Neopilina galathea* (and *Neopilina* in general) may be able  
172 to inhabit both hard and soft substrata. Unlike patellogastropod limpets which avoids  
173 sedimented bottoms, monoplacophorans happily transverse sediment (Sigwart *et al.*,

174 2019) which is perhaps an indication of their capacity to inhabit multiple substrate types.  
175 As trawled gears and box cores are deployed on soft bottoms to avoid damage, the  
176 sampling method explains the bias of the early records on soft bottoms (Parker, 1961).  
177 This, of course, is also supported by numerous records of small-bodied  
178 monoplacophorans taken on hard substrates, particularly manganese nodules  
179 (Lowenstam, 1978, Wiklund *et al.*, 2017).

180

181 Monoplacophorans are generally regarded as detritivores, and in this specimen we  
182 found faecal material similar in colouration to the surrounding thin sediment (Figure 2),  
183 agreeing with previous studies (Menzies *et al.*, 1959, Sigwart *et al.*, 2019). We did not,  
184 however, see clear grazing trackways associated with or around the animal as was  
185 sighted in a previous *Neopilina* encounter (Sigwart *et al.*, 2019). One estimate of *N.*  
186 *galathea* population density based on trawl area indicated an exceedingly low average  
187 density of one individual per 22000 square meters (Menzies *et al.*, 1959). The finding of  
188 10 specimens in a single trawl, however, would suggest local aggregations (Menzies *et*  
189 *al.*, 1959); a scenario also hinted by the Samoan sighting of *Neopilina* based on the high  
190 density of feeding trackways (Sigwart *et al.*, 2019). Although it is possible that this  
191 particular individual was not feeding, another possibility is that the glassy, black lava  
192 substrate made it difficult to see feeding trails. *Neopilina galathea* has also been  
193 suggested to feed on xenophyophores (Tendal, 1985). We did see numerous  
194 xenophyophores during the ROV dive, but we did not see *N. galathea* feeding on them.

195

196 This *in situ* rediscovery of the first monoplacophoran *Neopilina galathea* provides new  
197 insights on its distribution and ecology, and also a valuable specimen for future studies.  
198 We now know that fossil monoplacophorans are likely a collection of distantly related  
199 lineages that happened to have a similar shell morphology (Haszprunar & Ruthensteiner,  
200 2013), but the Paleozoic family Tryblidiidae within Monoplacophora have eight muscle  
201 scars strongly resembling living species and are likely directly related to them (Ponder  
202 *et al.*, 2020). Molecular phylogeny, however, has suggested that living  
203 monoplacophorans may have diverged only in the Late Cretaceous (Kano *et al.*, 2012) –  
204 leaving a gap of about 300 million years in their record. The new *N. galathea* specimen  
205 is likely the first large-bodied living monoplacophoran specimen collected in decades  
206 (Schwabe, 2008), and potentially also the first such specimen available for genomics  
207 work (Kocot *et al.*, 2020). It is hoped that future data from this specimen will shed  
208 bright light on the evolutionary history of these enigmatic “living fossils”.

209

210

211

## Acknowledgements

212

213 We thank the captain and crew on-board R/V *Falkor (too)* during the research cruise  
214 Fkt231024 ('Project Zombie: Bringing dead vents to life – Ultra Fine-Scale Seafloor  
215 Mapping') for their great support of our scientific activities. We extend this thanks to  
216 the ROV *SuBastian* support team, especially Jason Rodriguez who collected the  
217 monoplacophoran individual examined herein. All on-board scientists of the cruise  
218 Fkt231024 are gratefully acknowledged. Sigrid Hof and Sandra Müller (Senckenberg  
219 Museum, Frankfurt) were extremely helpful in procuring key literature for this study.

220

### Data

222 All relevant data are provided within the manuscript or the Supplementary Video  
223 available on Figshare, DOI: 10.6084/m9.figshare.24503623. The *Neopilina galathea*  
224 specimen is deposited in Senckenberg Natural History Museum, Frankfurt (SMF  
225 373198).

226

### Financial support

228 The research cruise Fkt231024 on-board R/V *Falkor (too)* was funded by Schmidt  
229 Ocean Institute.

230

### Conflict of interest

232 We declare that we have no conflict of interest.

233

### Ethical standards

235 Not applicable.

236

## References

237

238 **Clarke A.H. and Menzies R.J.** (1959) *Neopilina (Vema) ewingi*, a Second Living Species of the  
239 Paleozoic Class Monoplacophora. *Science*, **129**(3355), 1026-1027.

240 **Corliss J.B., et al.** (1979) Submarine Thermal Springs on the Galápagos Rift. *Science*, **203**(4385),  
241 1073-1083.

242 **Haszprunar G. and Ruthensteiner B.** (2013) Monoplacophora (Tryblidia)—Some Unanswered  
243 Questions. *American Malacological Bulletin*, **31**, 189-194.

244 **Kano Y., Kimura S., Kimura T. and Warén A.** (2012) Living Monoplacophora: morphological  
245 conservatism or recent diversification? *Zoologica Scripta*, **41**(5), 471-488.

246 **Kocot K.M., Poustka A.J., Stöger I., Halanych K.M. and Schrödl M.** (2020) New data from  
247 Monoplacophora and a carefully-curated dataset resolve molluscan relationships. *Scientific Reports*,  
248 **10**(1), 101.

249 **Lemche H.** (1957) A New Living Deep-Sea Mollusc of the Cambro-Devonian Class Monoplacophora.  
250 *Nature*, **179**(4556), 413-416.

251 **Lemche H. and Wingstrand K.G.** (1959) The anatomy of *Neopilina galathea* Lemche, 1957. *Galathea*  
252 *Report*, **3**, 9-71.

253 **Lindberg D.R.** (2009) Monoplacophorans and the Origin and Relationships of Mollusks. *Evolution:*  
254 *Education and Outreach*, **2**(2), 191-203.

255 **Lowenstam H.A.** (1978) Recovery, behaviour and evolutionary implications of live Monoplacophora.  
256 *Nature*, **273**(5659), 231-232.

257 **Menzies R.J.** (1968) New species of *Neopilina* of the Cambro-Devonian class Monoplacophora from the  
258 Milne-Edwards deep of the Peru-Chile Trench, R/V *Anton Bruun*. *Marine Biological Association of*  
259 *India, Proceedings of the Symposium on Mollusca*, **1**, 1-9.

260 **Menzies R.J., Ewing M., Worzel J.L. and Clarke A.H.** (1959) Ecology of the Recent Monoplacophora.  
261 *Oikos*, **10**(2), 168-182.

262 **Menzies R.J. and Layton W.** (1962) A new species of Monoplacophoran Mollusc, *Neopilina (Neopilina)*  
263 *veleronis* from the slope of the Cedros Trench, Mexico. *Annals and Magazine of Natural History*,  
264 **5**(13), 401-406.

265 **Moskalev L.I.** (1977) Towards a revision of molluscs Lepetidae (Gastropoda, Prosobranchia) of the  
266 world ocean. *Works of the P. P. Shirshov Institute of Oceanology, Academy of Sciences U.S.S.R.*, **108**,  
267 52–78.

268 **Moskalev L.I., Starobogatov Y.I. and Filatova Z.A.** (1983) New data on the abyssal Monoplacophora  
269 from the Pacific and South Atlantic Oceans. *Zoologiceskij Zhurnal*, **62**(7), 981–996.

270 **Parker R.H.** (1961) Speculations on the origin of the invertebrate faunas of the lower continental slope.  
271 *Deep Sea Research (1953)*, **8**(3), 286-293.



- 272 **Ponder W.F., Lindberg D.R. and Ponder J.M.** (2020) *Biology and Evolution of the Mollusca, Volume 2*  
273 Boca Raton: CRC Press.
- 274 **Schwabe E.** (2008) A summary of reports of abyssal and hadal Monoplacophora and Polyplacophora  
275 (Mollusca). *Zootaxa*, **1866**(1), 205-222.
- 276 **Shank T., et al.** (2012) Exploration of the deepwater Galápagos region. *Oceanography*, **25**, 50-51.
- 277 **Sigwart J.D., Wicksten M.K., Jackson M.G. and Herrera S.** (2019) Deep-sea video technology tracks  
278 a monoplacophoran to the end of its trail (Mollusca, Tryblidia). *Marine Biodiversity*, **49**(2), 825-832.
- 279 **Tebble N.** (1967) A *Neopilina* from the Gulf of Aden. *Nature*, **215**(5101), 663-664.
- 280 **Tendal O.S.** (1985) Xenophyophores (Protozoa, Sarcodina) in the diet of *Neopilina galathea* (Mollusca,  
281 Monoplacophora). *Galathea Reports*, **16**, 95–98.
- 282 **Warén A. and Gofas S.** (1996) A new species of Monoplacophora, redescription of the genera  
283 Veleropilina and Rokopella, and new information on three species of the class. *Zoologica Scripta*,  
284 **25**(3), 215-232.
- 285 **Wiklund H., et al.** (2017) Abyssal fauna of the UK-1 polymetallic nodule exploration area,  
286 Clarion-Clipperton Zone, central Pacific Ocean: Mollusca. *ZooKeys*, **707**.
- 287 **Wilson N.G., Huang D., Goldstein M.C., Cha H., Giribet G. and Rouse G.W.** (2009) Field collection  
288 of *Laevipilina hyalina* McLean, 1979 from southern California, the most accessible living  
289 monoplacophoran. *Journal of Molluscan Studies*, **75**(2), 195-197.
- 290 **Wolff T.** (1961) Animal life from a single abyssal trawling. *Galathea 2 Report*, **5**, 129-162.
- 291
- 292

293

## Figure Legends

294

295 **Figure 1.** (A) Typical substrate seen in Rose Garden, the collecting site, consisting of  
296 rather fresh, vitreous lobate and ropey lava flows. (B) The lava tower from which the  
297 *Neopilina galathea* specimen was collected, white arrow indicates the location of *N.*  
298 *galathea*. (C) Close-up on the *N. galathea* individual in life position.

299

300 **Figure 2.** The newly collected specimen of *Neopilina galathea* photographed from six  
301 different angles.

302

303 **Figure 3.** Summary map of all confirmed distribution records of *Neopilina galathea*  
304 (closed circle for the type locality, open circle for other records, and red star for the new  
305 record herein), and eastern Pacific records of *Neopilina* with uncertain species-level  
306 identity, including “*Neopilina aff. galathea*” *sensu* Moskalev, 1977 (open triangle) and  
307 *Neopilina* sp. (open squares).

308

309 **Supplementary Video.** ROV *SuBastian* collecting the monoplacophoran specimen  
310 during Dive #603, R/V *Falkor (too)* cruise Fkt231024. Available on Figshare, DOI:  
311 10.6084/m9.figshare.24503623

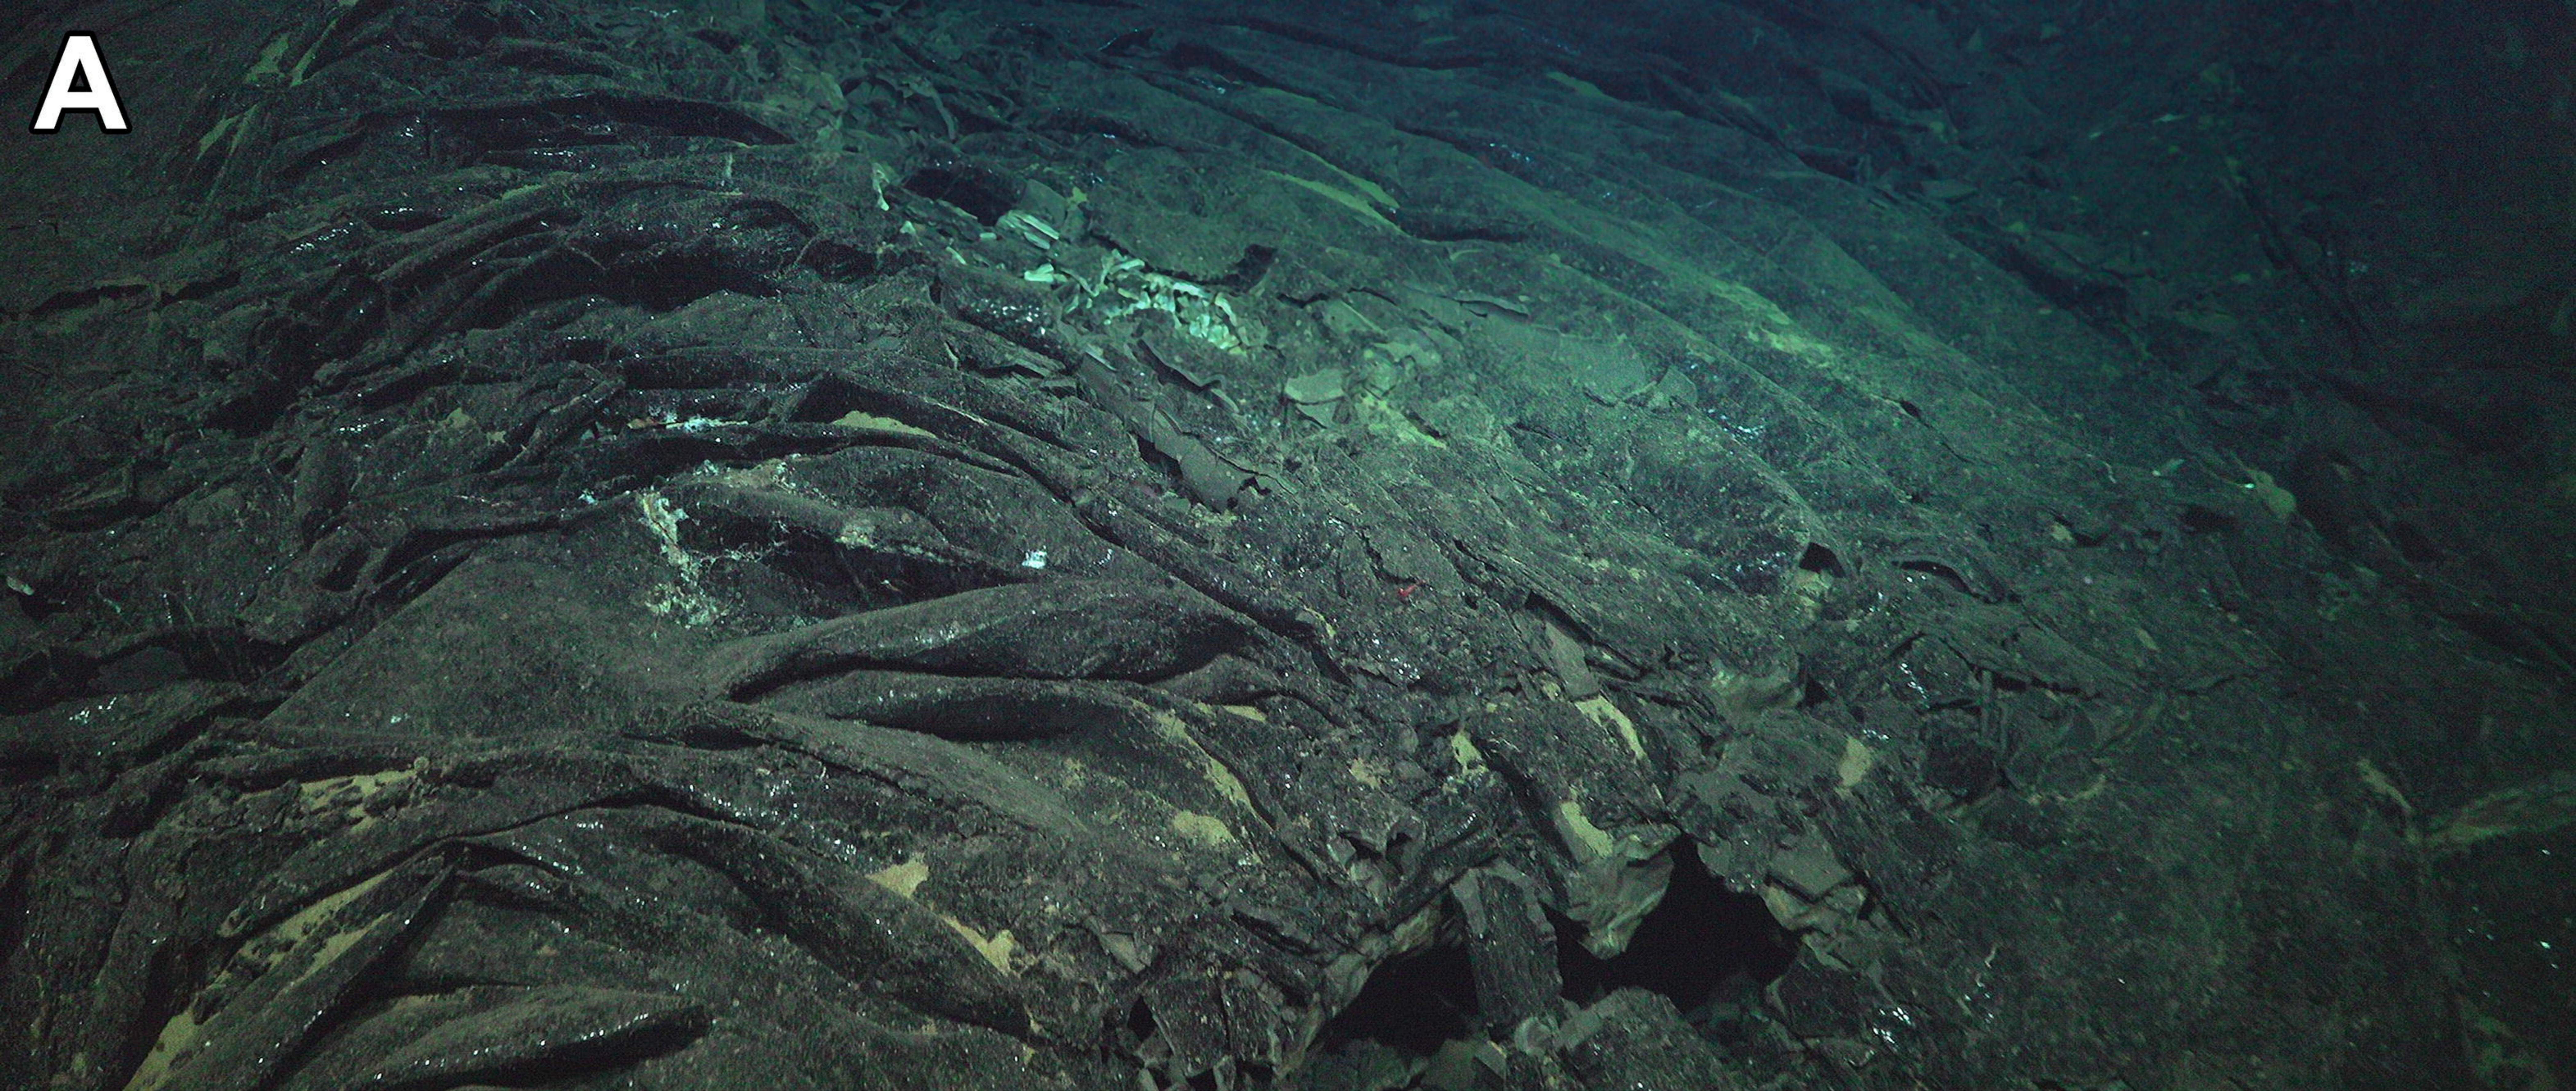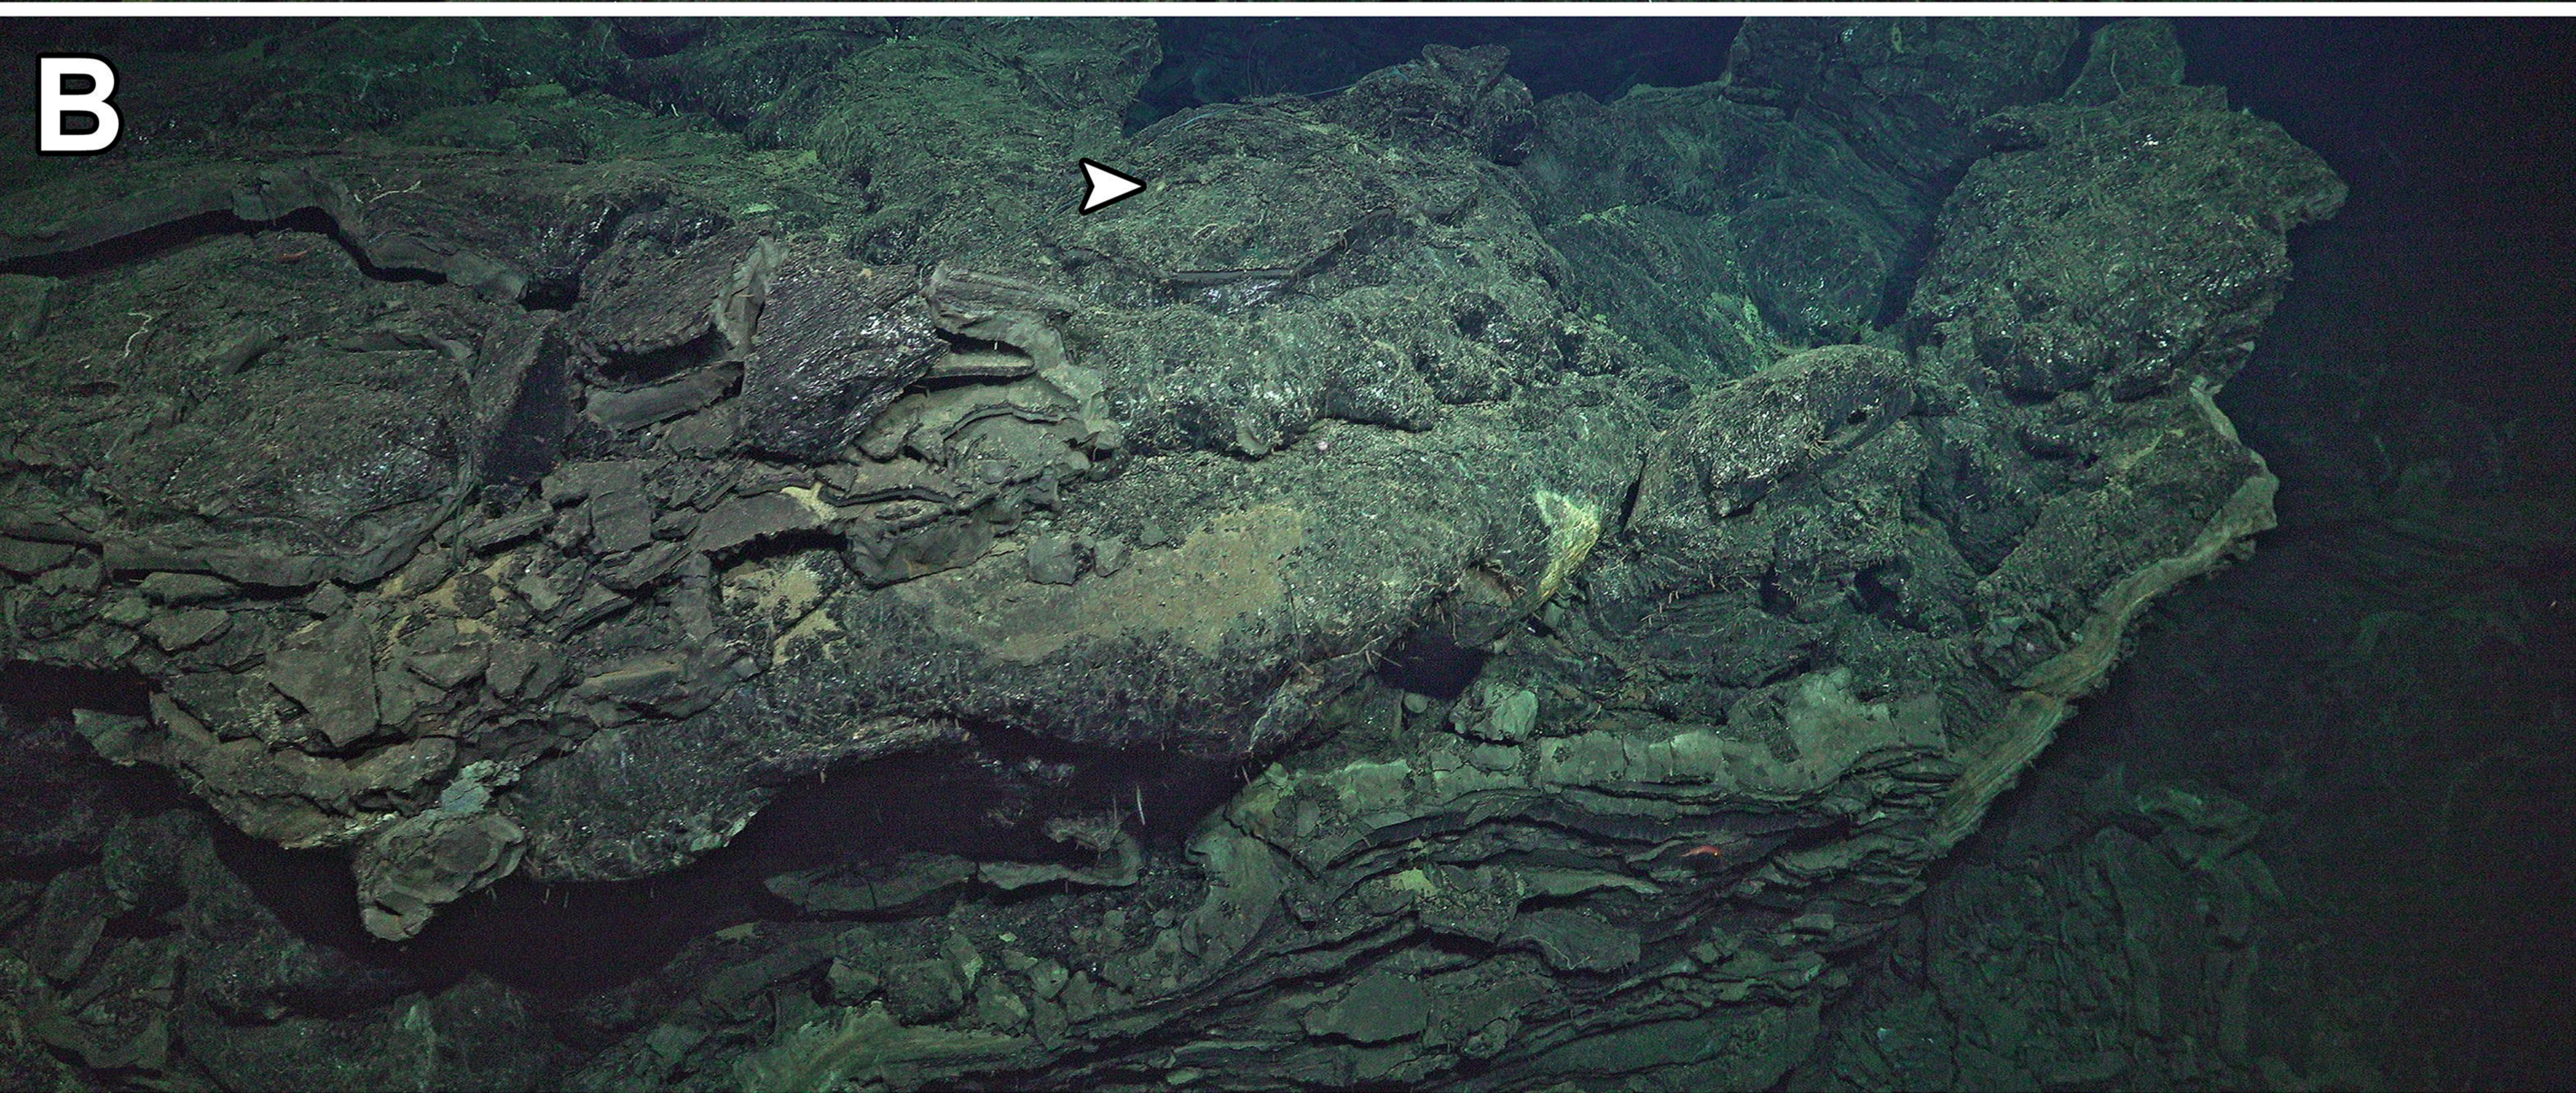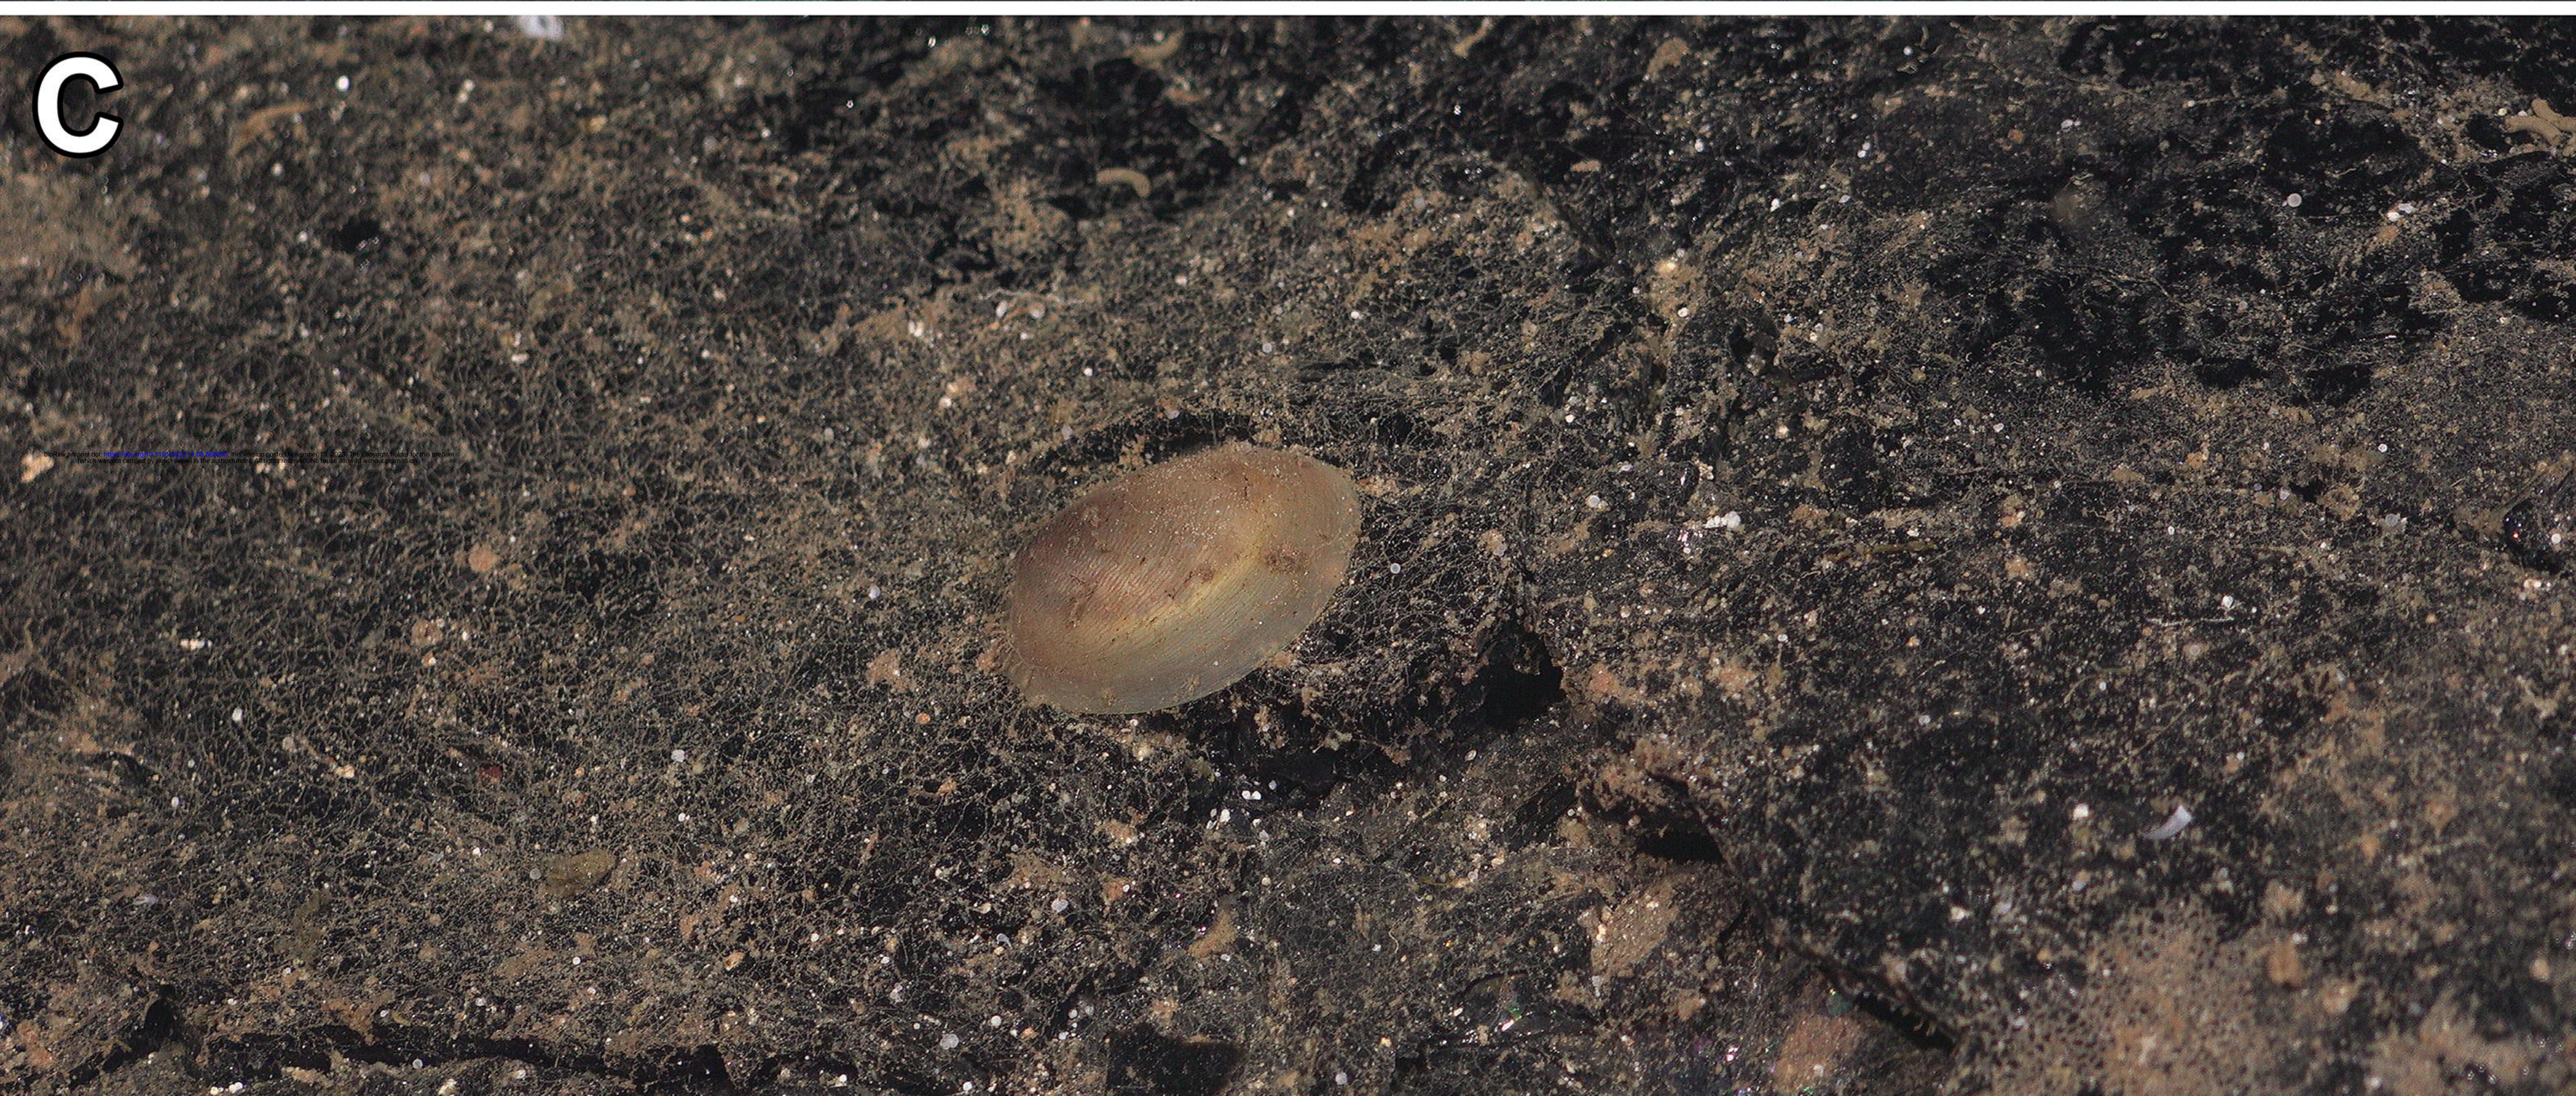

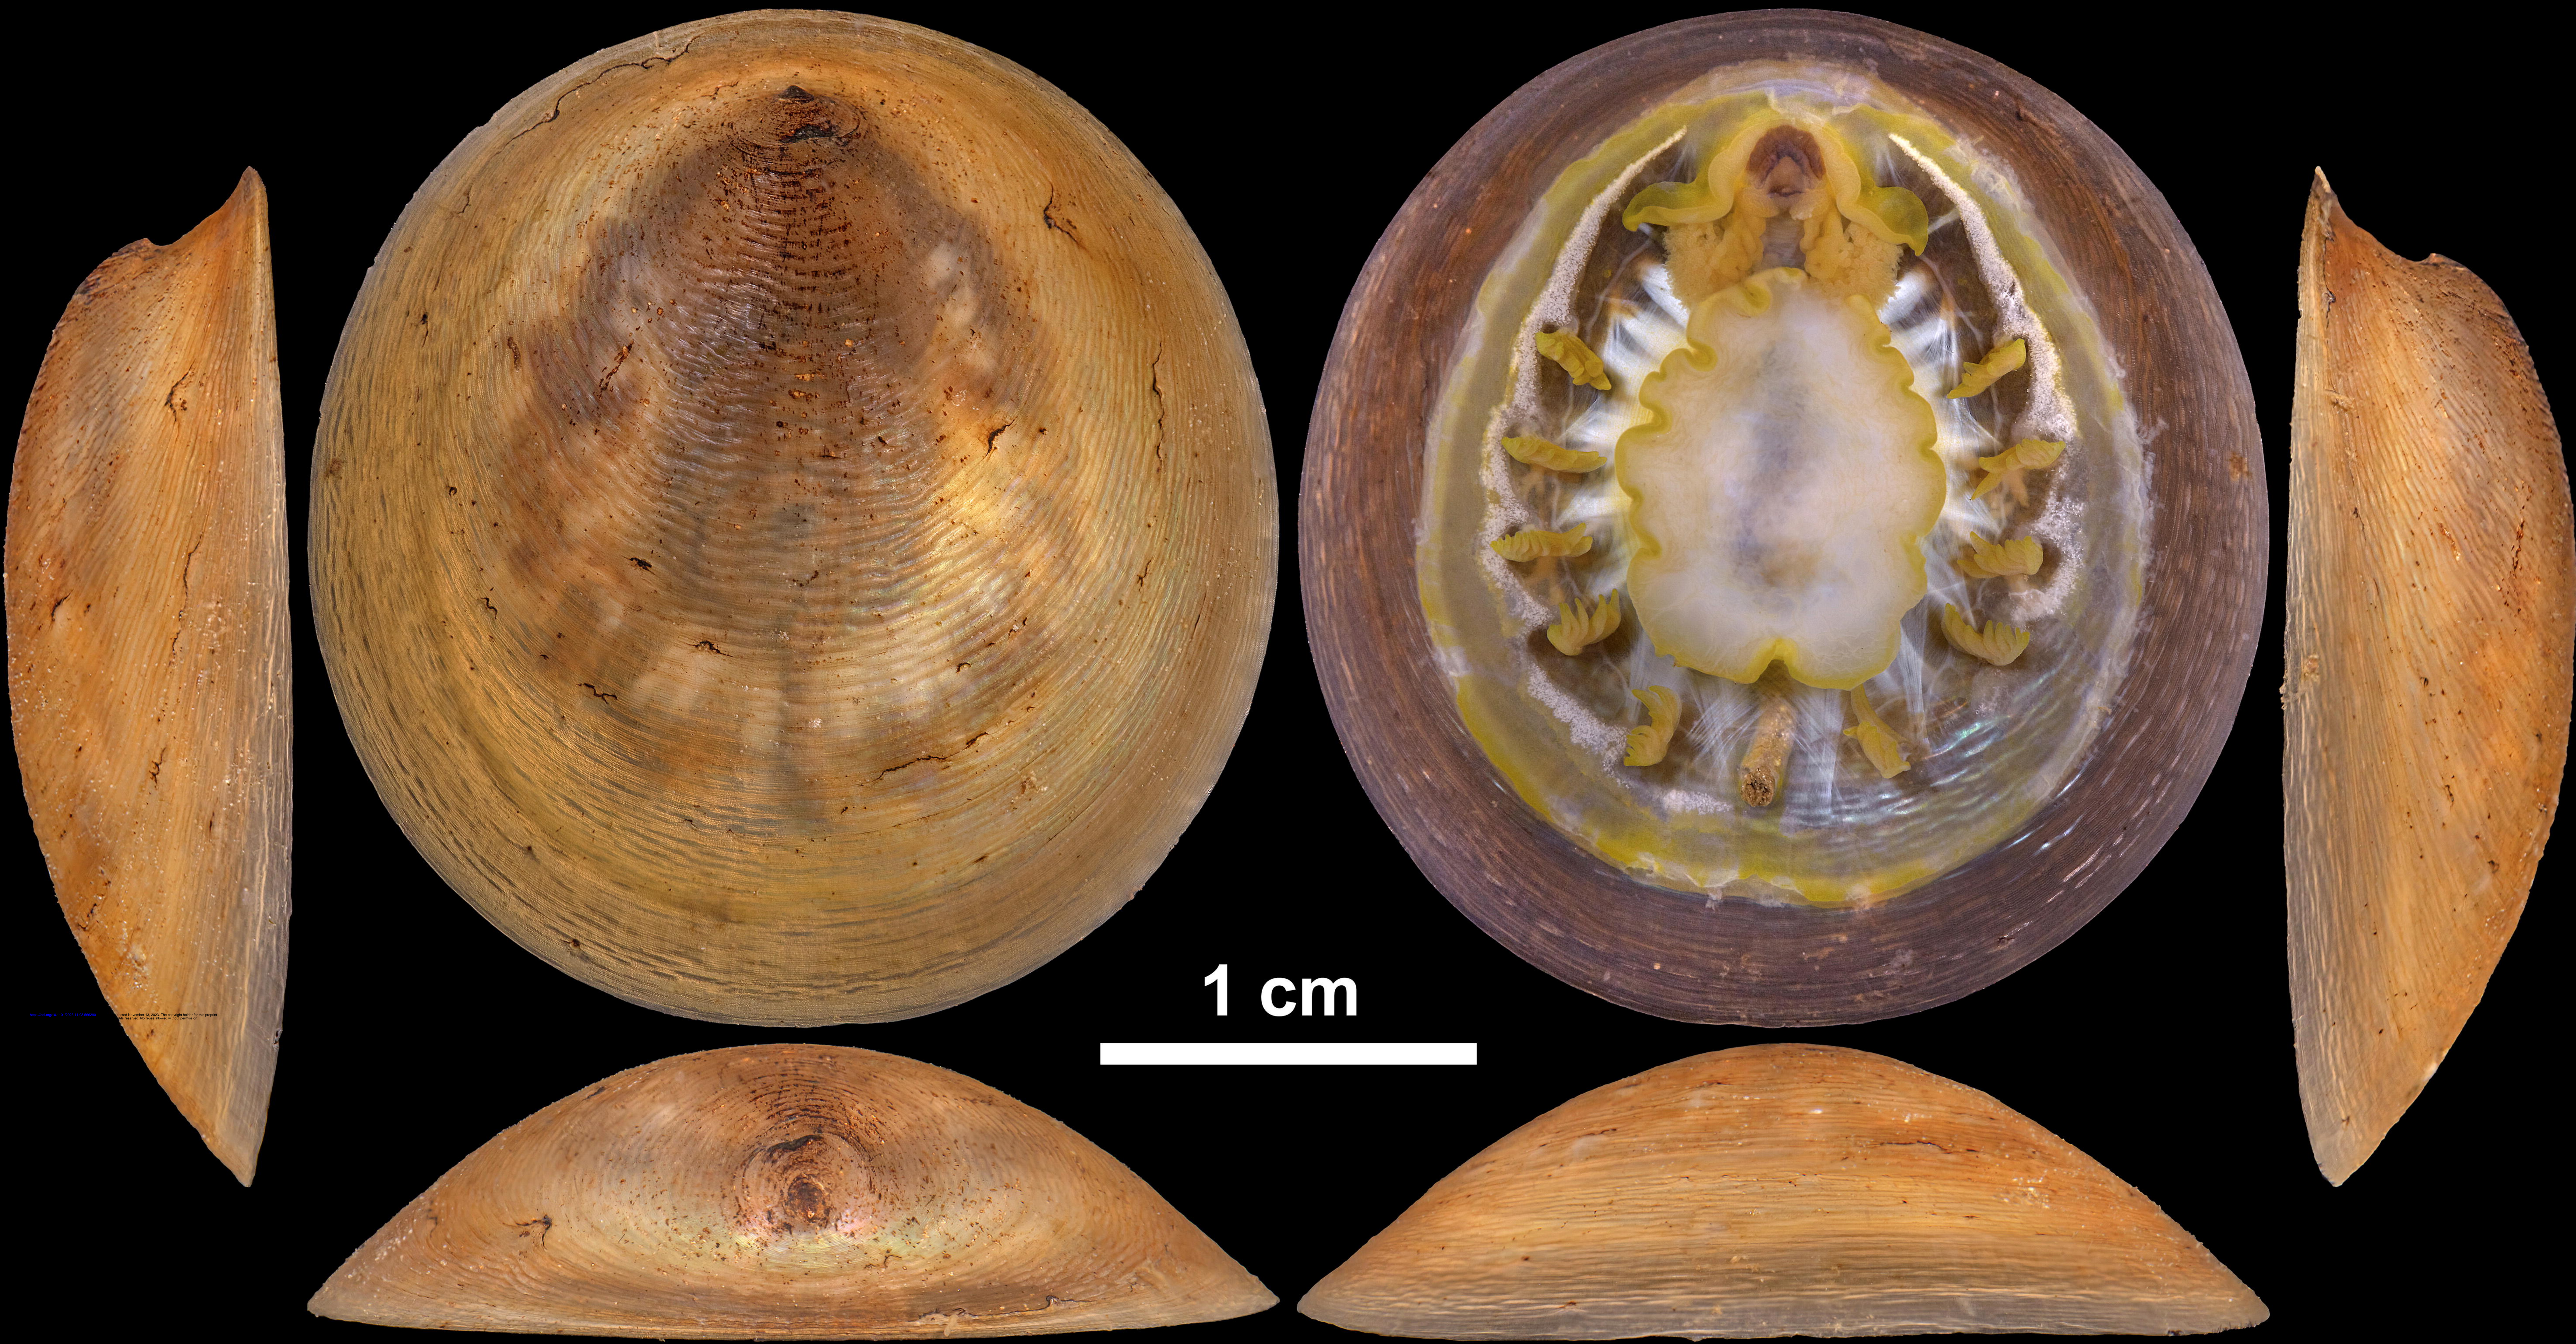

1 cm

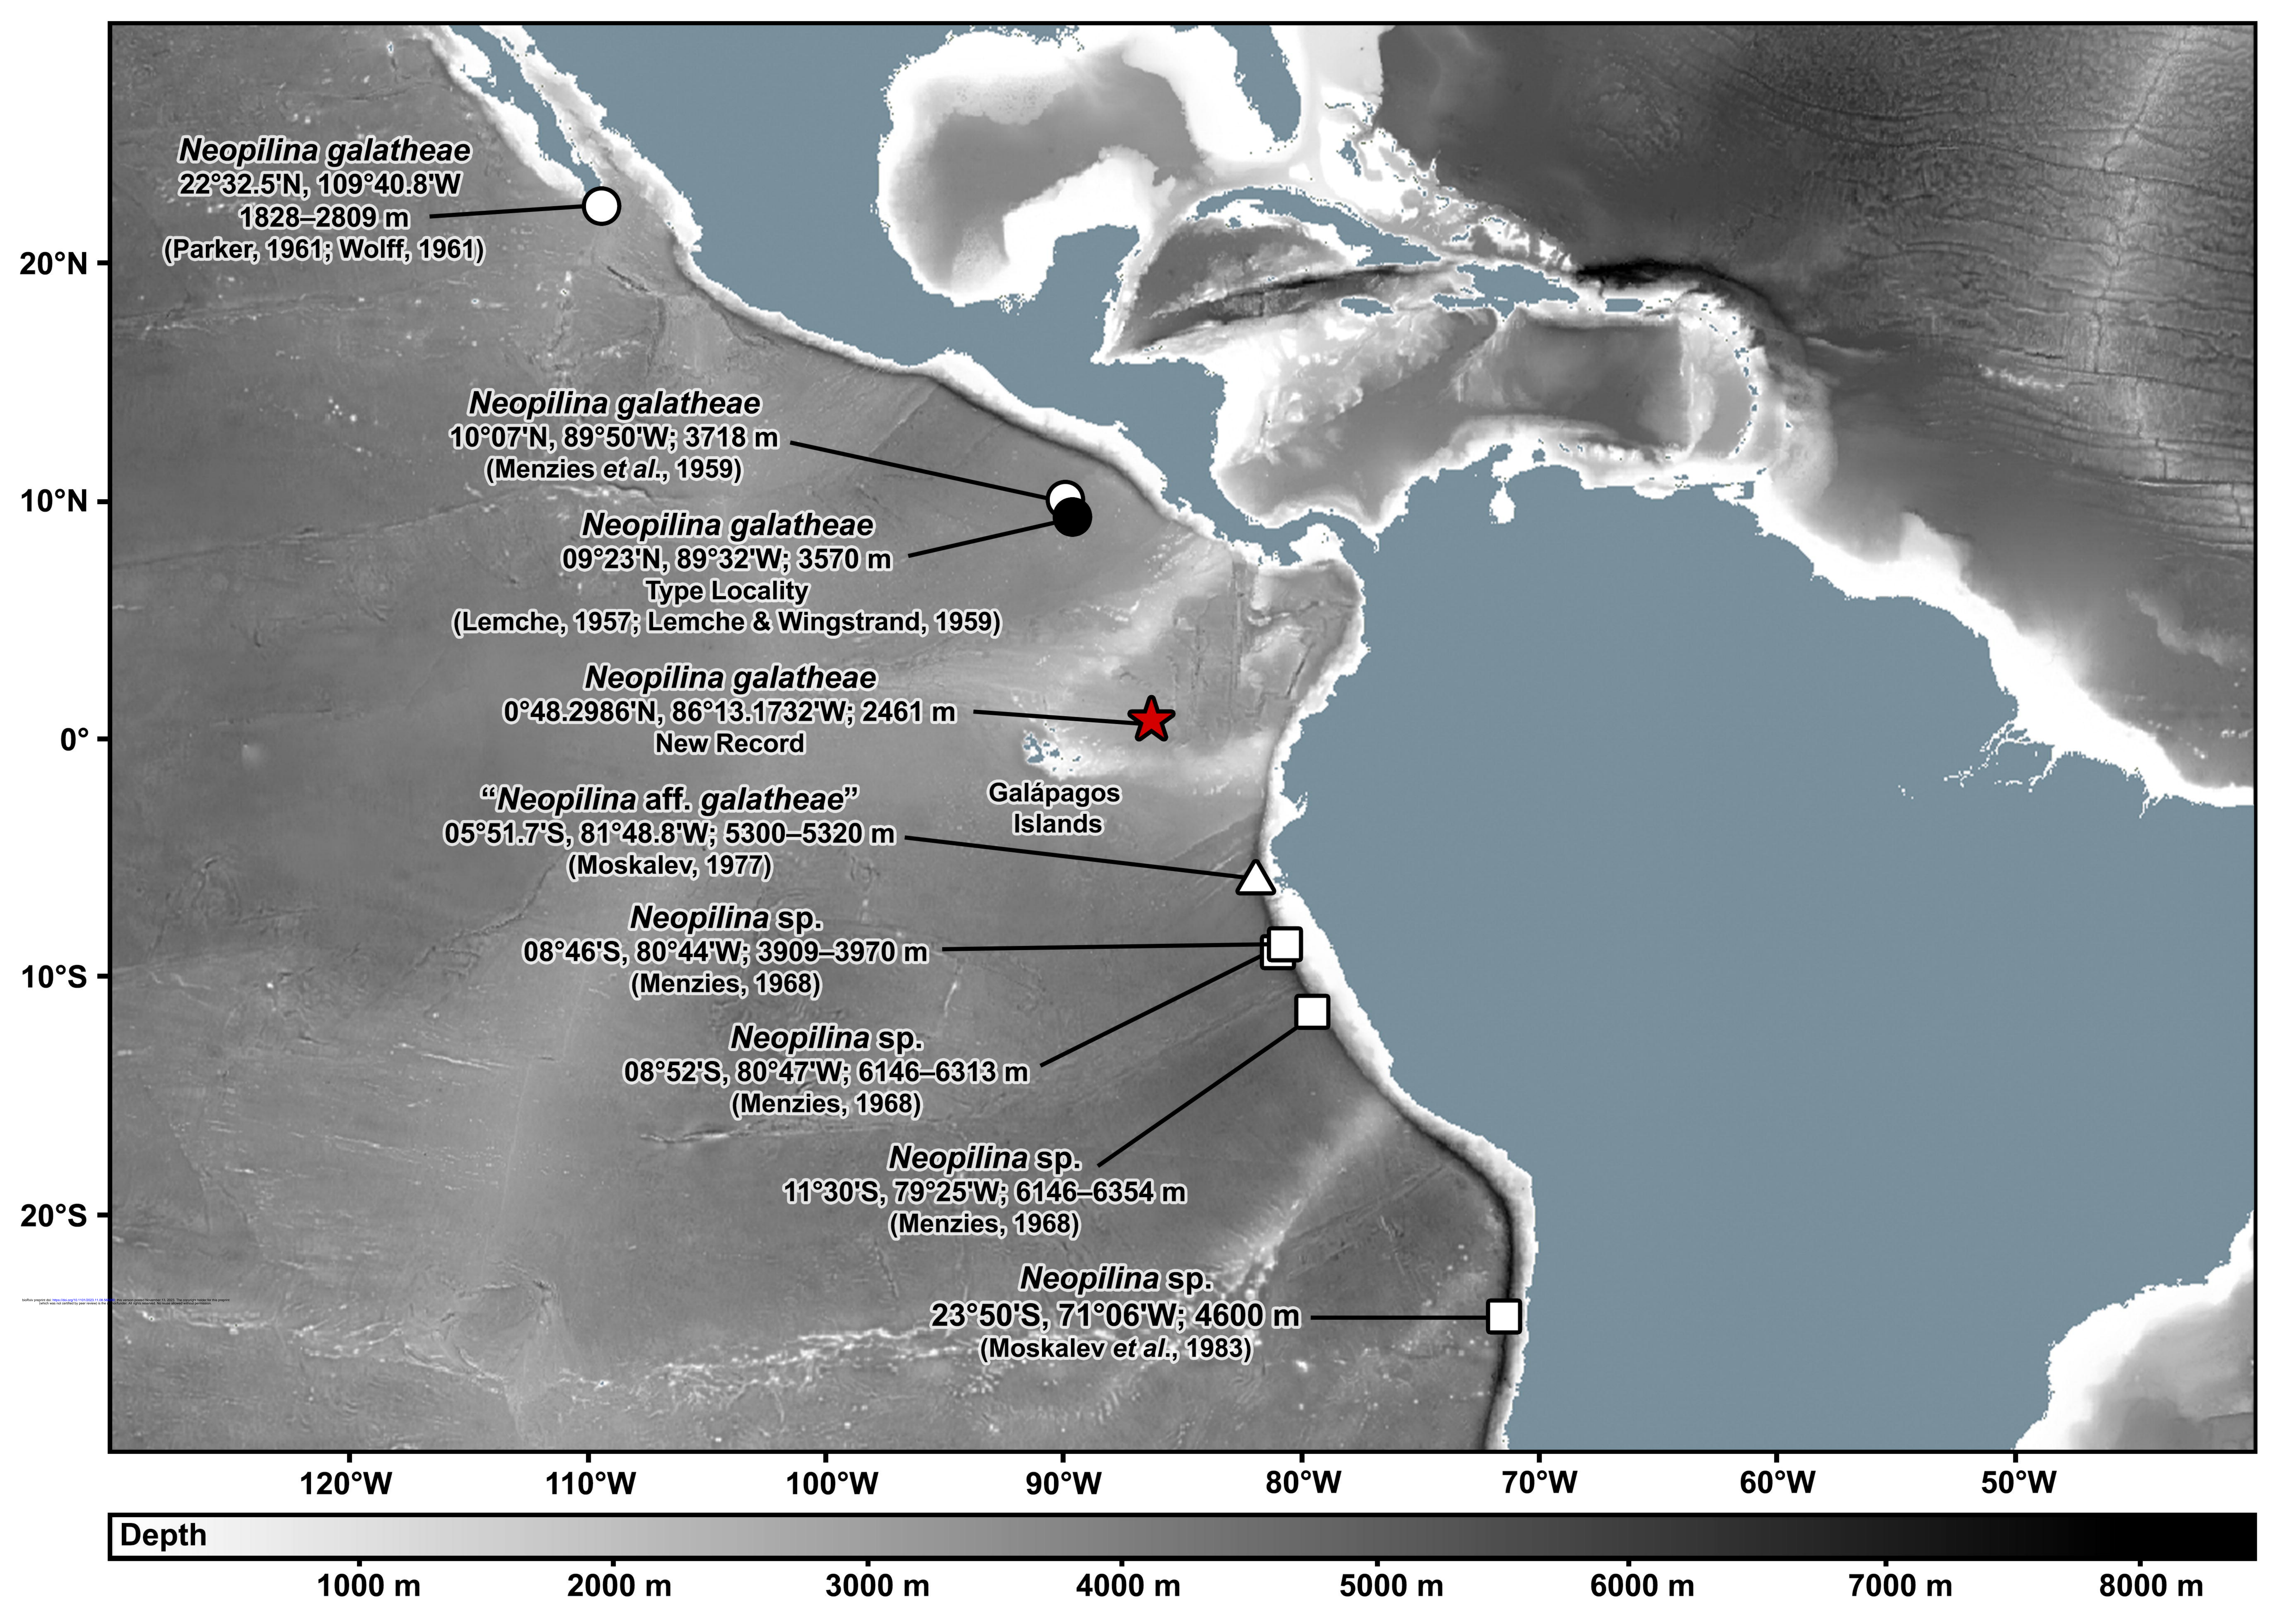

Source: https://www.biorxiv.org/content/biorxiv/early/2023/11/13/2023.11.08.566290.full.pdf
